# Supplementary material
Source: Royal Society of Chemistry journal article supplement (https://www.rsc.org/suppdata/dt/1998/1837/c801046.doc)
Supplement: Supplementary file 1 [file c801046.doc]

Response to steric constraint in azacryptate and related complexes of iron(II) and iron(III).

F.Anthony Deeneya, Charles J Hardingb, Grace G Morganc, Vickie McKeec, Jane Nelsonc, Simon J Teatd and William Cleggd.

**SUPPLEMENTARY MAGNETIC SUSCEPTIBILITY DATA**

------------------------------------------

Complex 2a: [Fe2(L2)(N3)](CF3SO3)3(H2O)2

-2J=9 g=2.24 Na=0.000160 Impurity=0.0000

Temp. 1E6Xm(expt) 1E6Xm(calc) %ERROR U(expt) U(calc)

----------------------------------------------------------------

79.92 31859 32373 -1.61 4.512 4.549

89.85 29785 30145 -1.21 4.626 4.654

99.86 27937 28133 -0.70 4.723 4.740

109.84 26293 26342 -0.19 4.806 4.810

120.04 24555 24709 -0.63 4.855 4.871

130.05 23179 23277 -0.42 4.910 4.920

140.05 21952 21993 -0.18 4.959 4.963

150.05 20854 20835 0.09 5.003 5.000

160.04 19831 19789 0.22 5.038 5.033

170.05 18899 18837 0.33 5.070 5.061

180.04 18068 17971 0.54 5.101 5.087

190.07 17238 17177 0.35 5.119 5.110

200.07 16484 16450 0.20 5.136 5.130

210.07 15819 15781 0.24 5.155 5.149

220.07 15181 15164 0.11 5.169 5.166

230.08 14623 14591 0.21 5.187 5.182

240.07 14086 14061 0.18 5.201 5.196

250.08 13566 13567 -0.00 5.209 5.209

260.08 13115 13106 0.07 5.223 5.221

270.09 12714 12675 0.31 5.241 5.232

280.09 12301 12271 0.25 5.249 5.243

290.10 11880 11892 -0.11 5.250 5.253

300.07 11509 11537 -0.24 5.255 5.262

Standard.Deviation.= 0.02489

Magnetic Data for **2a',** [Fe(L2)(N3)](ClO4)3.2H2O

-2*J* = 2.6 cm-1; *g* = 2.07; q = 2.1 K; TIP = 400x10-6cgsu; impurity = 6.0%

| *T*/K | 106 **m/cgsu  (expt) | 106 **m/cgsu  (theor) | **/B.M.  (expt) | **/B.M. (theor) |
| --- | --- | --- | --- | --- |
| 4.2 | 246700 | 249170 | 2.879 | 2.893 |
| 4.85 | 229340 | 226130 | 2.983 | 2.962 |
| 5.9 | 202320 | 200210 | 3.090 | 3.074 |
| 7.0 | 180700 | 180960 | 3.181 | 3.183 |
| 8.1 | 165000 | 166090 | 3.269 | 3.280 |
| 9.3 | 151650 | 152900 | 3.358 | 3.372 |
| 10.5 | 140820 | 141820 | 3.439 | 3.451 |
| 12.6 | 125630 | 125950 | 3.558 | 3.563 |
| 15.9 | 106080 | 107090 | 3.673 | 3.690 |
| 21.5 | 84980 | 85310 | 3.823 | 3.830 |
| 32.2 | 63230 | 61560 | 4.035 | 3.982 |
| 42.7 | 49880 | 48580 | 4.127 | 4.073 |
| 52.6 | 41850 | 40720 | 4.196 | 4.139 |
| 62.2 | 36410 | 35320 | 4.256 | 4.192 |
| 71.8 | 32300 | 31290 | 4.307 | 4.239 |
| 81.3 | 29070 | 28200 | 4.348 | 4.282 |
| 91.0 | 26400 | 25680 | 4.383 | 4.323 |
| 100.5 | 24240 | 23670 | 4.414 | 4.362 |
| 110.1 | 22430 | 21970 | 4.444 | 4.398 |
| 119.7 | 20860 | 20540 | 4.469 | 4.434 |
| 129.3 | 19530 | 19320 | 4.494 | 4.470 |
| 138.8 | 18370 | 18270 | 4.516 | 4.503 |
| 148.5 | 17350 | 17340 | 4.539 | 4.538 |
| 158.6 | 16420 | 16480 | 4.564 | 4.572 |
| 168.3 | 15640 | 15750 | 4.588 | 4.604 |
| 178.0 | 14900 | 15100 | 4.606 | 4.636 |
| 187.7 | 14230 | 14520 | 4.622 | 4.669 |
| 197.4 | 13640 | 14000 | 4.640 | 4.701 |
| 207.1 | 13090 | 13520 | 4.656 | 4.732 |
| 216.8 | 12600 | 13080 | 4.674 | 4.762 |
| 226.6 | 12140 | 12680 | 4.691 | 4.794 |
| 236.4 | 11720 | 12310 | 4.707 | 4.824 |
| 246.3 | 11330 | 11960 | 4.724 | 4.854 |
| 256.0 | 10970 | 11650 | 4.739 | 4.884 |
| 265.9 | 10620 | 11360 | 4.752 | 4.915 |
| 275.7 | 10300 | 11080 | 4.766 | 4.943 |
| 285.5 | 10010 | 10830 | 4.781 | 4.973 |

SUPPLEMENTARY MAGNETIC SUSCEPTIBILITY DATA

------------------------------------------

Compound **2b**: [Fe2(L2)(OH)](PF6)3(H2O)4

-2J=23 g=2.16 Na=0.000300 Impurity=0.0000%

Temp. 1E6Xm(expt) 1E6Xm(calc) %ERROR U(expt) U(calc)

----------------------------------------------------------------

79.90 16657 16084 3.44 3.263 3.206

89.92 16256 15929 2.01 3.419 3.384

99.88 15859 15689 1.07 3.559 3.540

109.88 15436 15386 0.32 3.683 3.677

120.05 14985 15036 -0.34 3.793 3.799

130.03 14562 14665 -0.71 3.892 3.905

140.03 14144 14281 -0.97 3.980 3.999

150.05 13738 13891 -1.11 4.060 4.083

160.03 13358 13505 -1.10 4.135 4.157

170.06 13015 13122 -0.83 4.207 4.225

180.06 12638 12750 -0.89 4.266 4.285

190.01 12308 12391 -0.68 4.325 4.339

200.06 11956 12041 -0.71 4.374 4.389

210.02 11647 11708 -0.52 4.423 4.434

220.03 11350 11385 -0.31 4.469 4.476

230.03 11112 11077 0.32 4.521 4.514

240.03 10785 10781 0.04 4.550 4.549

250.06 10547 10498 0.47 4.593 4.582

260.08 10279 10227 0.51 4.624 4.612

270.05 10058 9969 0.88 4.661 4.640

280.02 9807 9722 0.86 4.686 4.666

290.05 9610 9485 1.31 4.722 4.691

300.05 9401 9258 1.52 4.750 4.713

Standard.Deviation.= 0.05487

SUPPLEMENTARY MAGNETIC SUSCEPTIBILITY DATA

------------------------------------------

Complex **3**: [Fe2(L3)(OH)](CF3SO3)2(BPh4)

-2J=27 g=2.13 Na=0.000080 Impurity=0.0000

Temp. 1E6Xm(expt) 1E6Xm(calc) %ERROR U(expt) U(calc)

----------------------------------------------------------------

79.89 13413 13268 1.08 2.928 2.912

89.94 13337 13262 0.57 3.097 3.089

99.92 13265 13182 0.63 3.256 3.246

109.90 13092 13044 0.37 3.392 3.386

120.05 12864 12856 0.06 3.514 3.513

130.05 12619 12636 -0.14 3.623 3.625

140.05 12395 12393 0.02 3.726 3.726

150.05 12116 12133 -0.14 3.813 3.816

160.06 11829 11864 -0.30 3.891 3.897

170.06 11575 11590 -0.13 3.968 3.970

180.05 11309 11316 -0.06 4.035 4.037

190.05 11030 11043 -0.12 4.095 4.097

200.08 10773 10774 -0.01 4.152 4.152

210.04 10511 10512 -0.01 4.202 4.202

220.07 10227 10255 -0.27 4.243 4.248

230.07 10016 10007 0.10 4.293 4.291

240.04 9771 9766 0.05 4.331 4.330

250.05 9543 9533 0.11 4.369 4.366

260.05 9315 9308 0.07 4.401 4.400

270.03 9104 9091 0.14 4.434 4.431

280.05 8884 8882 0.02 4.461 4.460

290.05 8664 8680 -0.18 4.483 4.487

300.05 8457 8486 -0.34 4.505 4.513

Standard.Deviation.= 0.01569

SUPPLEMENTARY MAGNETIC SUSCEPTIBILITY DATA

-------------------------------------------

Complex **4a**: [Fe(L4)](ClO4)3(CH3CN)0.5

Temp. 1E6Xm(expt) U(expt)

---------------------------------------------------

4.5 453974 4.042

4.7 446455 4.056

5.4 382473 4.064

6.8 306533 4.083

8.2 253703 4.079

10.6 197917 4.096

16.10 136186 4.188

21.68 100295 4.170

27.19 79674 4.163

32.39 66647 4.155

37.62 57307 4.152

42.83 50256 4.149

52.93 40478 4.139

62.66 34003 4.128

72.24 29462 4.126

81.78 25973 4.122

91.48 23248 4.124

101.03 21049 4.124

110.58 19210 4.122

120.28 17701 4.126

129.88 16371 4.124

139.48 15256 4.125

149.09 14274 4.125

158.68 13426 4.128

168.25 12628 4.122

177.89 11983 4.129

187.52 11394 4.134

197.23 10853 4.137

206.93 10326 4.134

216.61 9867 4.134

226.42 9449 4.136

236.21 9019 4.128

246.18 8575 4.109

255.96 8290 4.120

265.84 8017 4.129

275.67 7708 4.123

285.39 7306 4.083

Supplementary Magnetic Susceptibility Data

Complex **5,** [Fe(L5)](ClO4)3.EtOH

| *T*/K | 106 *c*w/cgsu | 106 *c*m/cgsu | **/B.M. |
| --- | --- | --- | --- |
|  |  |  |  |
| 4.6 | 249.50 | 300848 | 3.327 |
| 4.7 | 250.02 | 301473 | 3.366 |
| 6 | 200.44 | 241802 | 3.406 |
| 8.2 | 150.52 | 181740 | 3.452 |
| 10.4 | 120.08 | 145109 | 3.474 |
| 16.2 | 77.96 | 94419 | 3.498 |
| 21.5 | 59.40 | 72081 | 3.521 |
| 21.4 | 60.77 | 73735 | 3.552 |
| 32.1 | 40.79 | 49689 | 3.572 |
| 42.6 | 31.14 | 38075 | 3.602 |
| 52.7 | 25.29 | 31045 | 3.617 |
| 62.5 | 21.41 | 26367 | 3.630 |
| 72.4 | 18.56 | 22938 | 3.644 |
| 82.1 | 16.37 | 20304 | 3.651 |
| 89.65 | 14.38 | 17905 | 3.583 |
| 99.05 | 13.30 | 16605 | 3.627 |
| 108.55 | 12.10 | 15163 | 3.628 |
| 118.6 | 10.87 | 13784 | 3.616 |
| 128.1 | 9.95 | 12577 | 3.590 |
| 137.6 | 9.20 | 11679 | 3.585 |
| 147.2 | 8.57 | 10814 | 3.568 |
| 156.7 | 8.01 | 10248 | 3.584 |
| 166.3 | 7.51 | 9644 | 3.581 |
| 175.85 | 7.06 | 9107 | 3.579 |
| 185.45 | 6.65 | 8610 | 3.574 |
| 195.05 | 6.31 | 8194 | 3.575 |
| 204.65 | 5.94 | 7761 | 3.564 |
| 214.3 | 5.67 | 7425 | 3.567 |
| 224 | 5.39 | 7089 | 3.564 |
| 233.7 | 5.14 | 6786 | 3.561 |
| 243.3 | 4.99 | 6489 | 3.553 |
| 253.1 | 4.77 | 6233 | 3.552 |
| 262.75 | 4.40 | 5896 | 3.520 |
| 272.55 | 4.18 | 5636 | 3.505 |
| 282.25 | 3.98 | 5380 | 3.485 |
| 291.8 | 3.76 | 5187 | 3.479 |

SUPPLEMENTARY MAGNETIC SUSCEPTIBILITY DATA

------------------------------------------

Complex **8**: [Fe(L8](ClO4)(H2O)3

Temp. 1E6Xm(expt) U(expt)

------------------------------

4.2 223324 2.74

5.0 199282 2.82

6.0 168949 2.85

7.0 146030 2.86

8.4 124235 2.89

11.6 93004 2.94

16.2 68737 2.97

21.4 52560 3.00

32.2 27822 3.08

42.6 28191 3.10

52.92 25195 3.265

62.62 21675 3.295

72.22 19105 3.322

81.85 17155 3.351

91.61 15606 3.381

101.18 14371 3.410

110.83 13371 3.443

120.52 12518 3.473

130.25 11809 3.507

140.01 11200 3.541

149.67 10676 3.575

159.94 10206 3.613

169.67 9805 3.648

189.07 9158 3.721

198.83 8854 3.752

208.63 8643 3.798

218.75 8422 3.838

228.30 8208 3.871

238.07 8034 3.911

247.78 7869 3.949

257.60 7710 3.986

267.43 7573 4.025

277.38 7453 4.066

286.91 7332 4.102
